# Supplementary material for: Structural Studies of Mexican Husk Tomato (Physalis ixocarpa) Fruit Cutin
Source: MDPI journal article supplement (doi:10.3390/molecules29010184), 2023-12-28
Supplement: s1 [file s1]

**MONOMER I**  
**9,10-EPOXY-18-HYDROXY-OCTADECANOIC ACID**

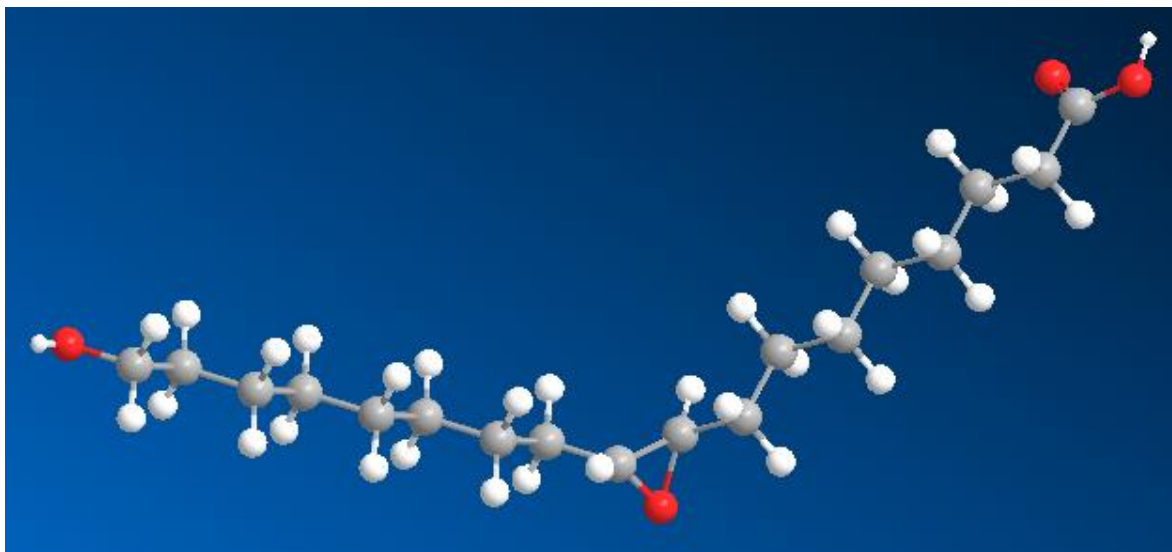

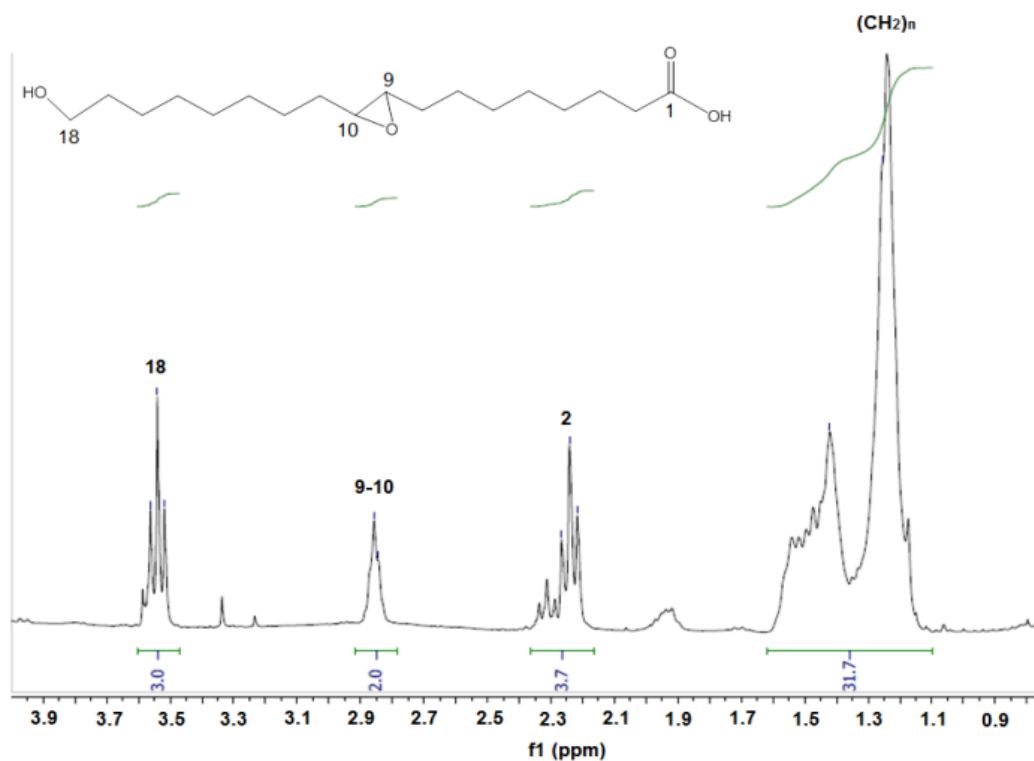

**Figure S1.**  $^1\text{H}$  NMR spectra of 9,10-epoxy-18-hydroxy-octadecanoic acid.

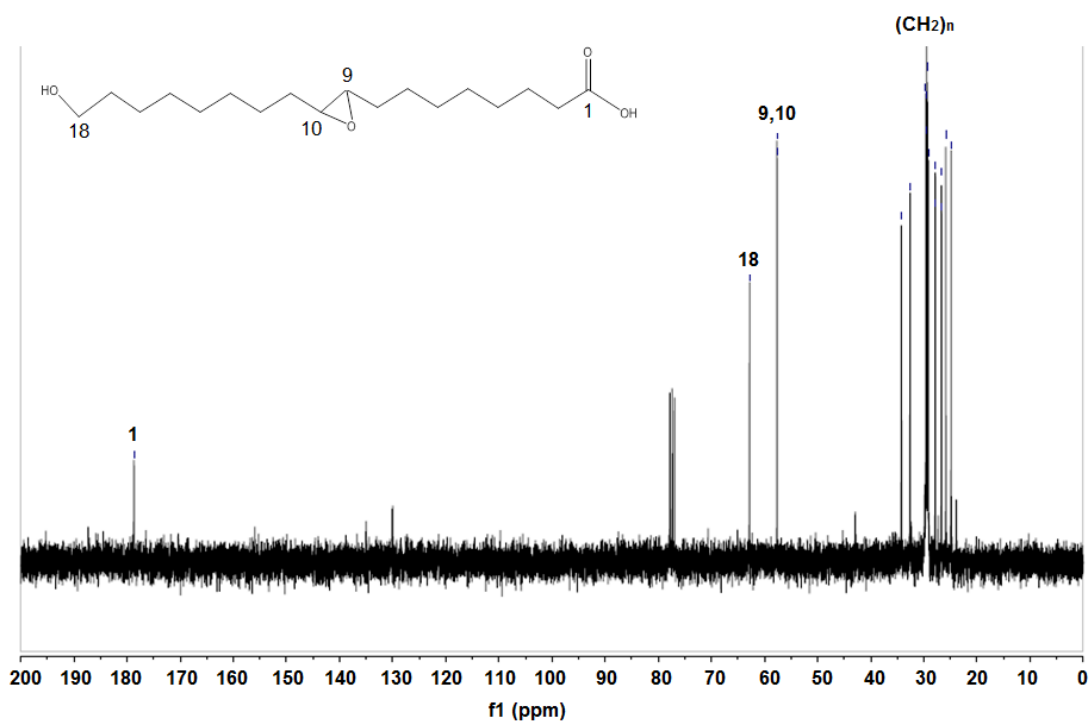

**Figure S2.**  $^{13}\text{C}$  NMR spectra of 9,10-epoxy-18-hydroxy-octadecanoic acid.

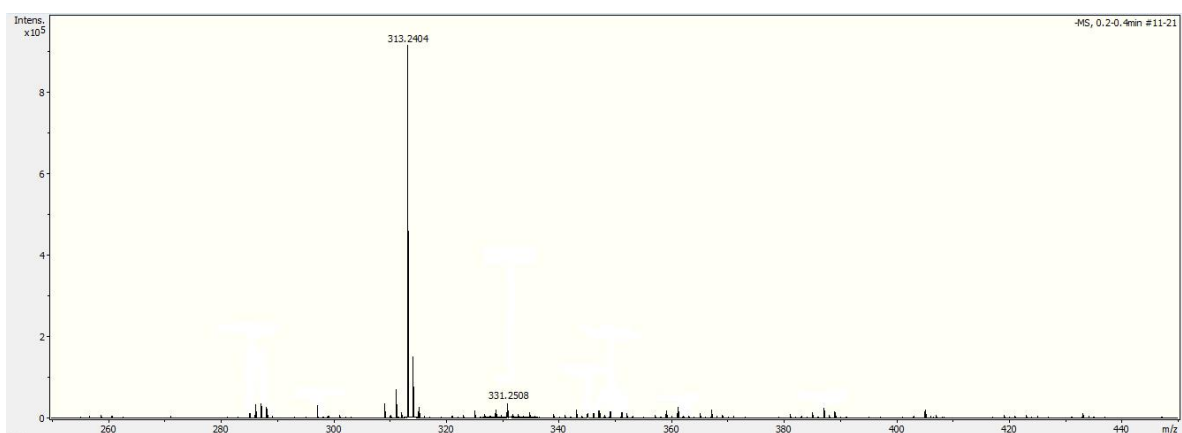

**Figure S3.** DIESI-MS spectra of 9,10-epoxy-hydroxy-octadecanoic acid.

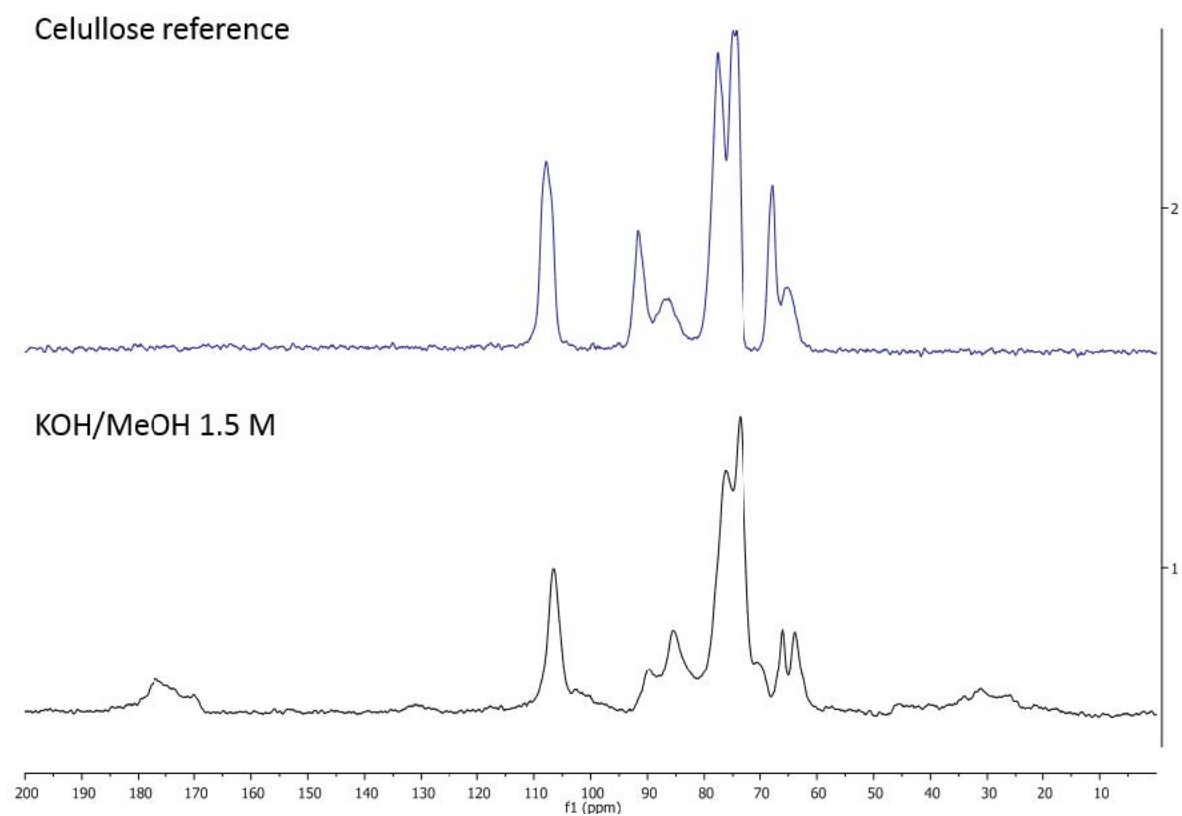

**Figure S4.** Comparative analysis of the cellulose (upper spectra) and residual cuticular material from the alkaline hydrolysis (KOH/MeOH 1.5 M)

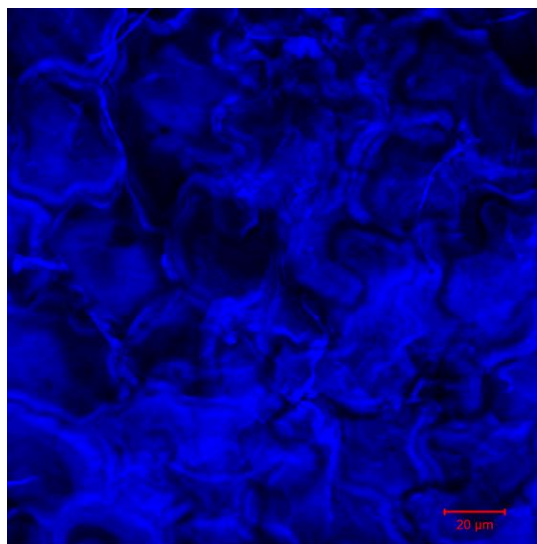

**Figure S5.** Cellulose fluorescence with calcofluor staining (405 nm) of the residual cuticular material from the alkaline hydrolysis (KOH/MeOH 1.5 M)
